# Supplementary material for: Sensitivity improvement of Au-nanoparticle-based colorimetric probes via surface decoration of carbon quantum dots
Source: Royal Society of Chemistry journal article supplement (doi:10.1039/d4nj00640b), 2024-01-01
Supplement: d4nj00640b1.pdf [file d4nj00640b1.pdf]

## Supplementary Information

### Sensitivity improvement of Au-nanoparticle based colorimetric probes via surface decoration of carbon quantum dots

Yi-Ting Li<sup>1&</sup>, Chien Feng Lo<sup>1&</sup>, Kuan-Han Lin<sup>1</sup>, Pin-Chao Liao<sup>2</sup>, Joon Ching Juan<sup>3</sup>, Po-Hsuan Hsiao<sup>1</sup>, and Chia-Yun Chen<sup>1,2,4\*</sup>

<sup>1</sup>Department of Materials Science and Engineering, National Cheng-Kung University, Tainan 701, Taiwan

<sup>2</sup>Program on Semiconductor Packaging and Testing, Academy of Innovative Semiconductor and Sustainable Manufacturing, National Cheng Kung University, Tainan 70101, Taiwan

<sup>3</sup>Nanotechnology & Catalysis Research Centre, Institute for Advanced Studies, University of Malaya, 50603 Kuala Lumpur, Malaysia

<sup>4</sup>Hierarchical Green-Energy Materials (Hi-GEM) Research Center, National Cheng Kung University, No.1 University Road, Tainan 701, Taiwan

\*Email: [timcychen@mail.ncku.edu.tw](mailto:timcychen@mail.ncku.edu.tw)

#### S1 Size variation of CQD@AuNPs based on DLS measurements

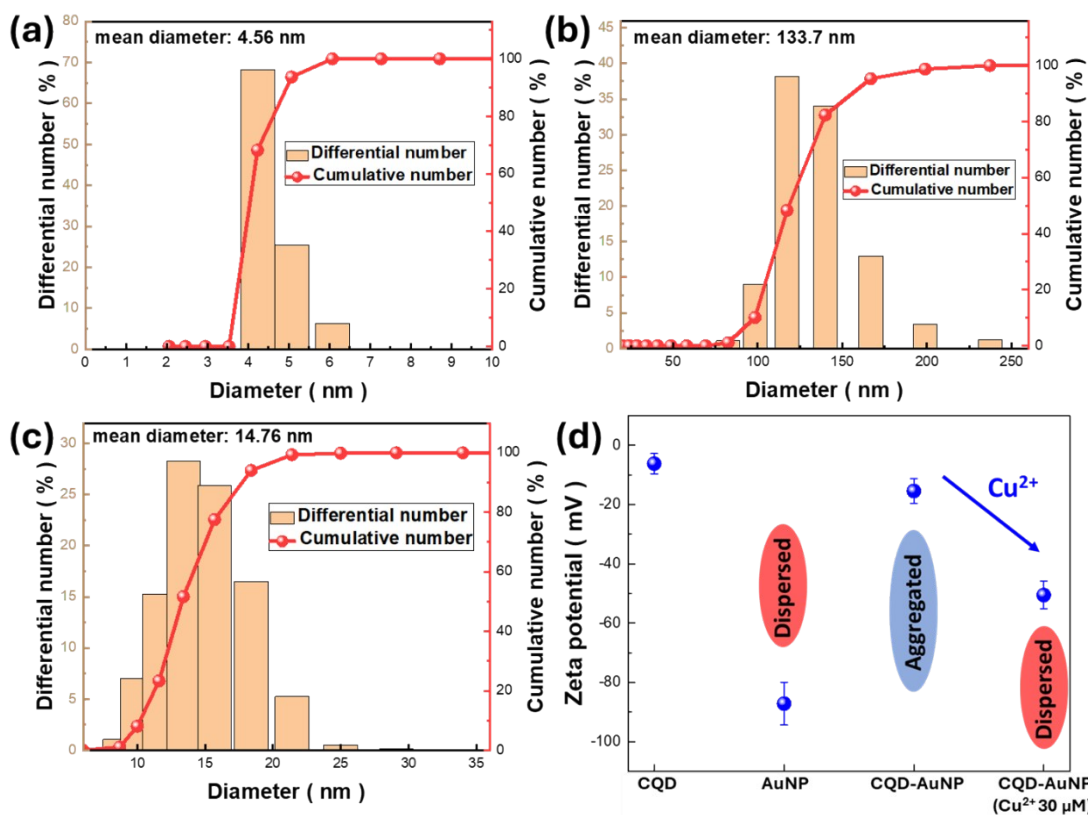

Fig. S1 Dynamic light scattering (DLS) measurements of (a) bare CQDs, (b) pristine CQD@AuNPs and (c) CQD@AuNPs immersed in 30 μM of Cu<sup>2+</sup> ions for 10 min. The

results agreed well with TEM observations shown in Figs. 1(c) and 1(d), respectively. (d) zeta potential of different sample.

## S2 Full survey of XPS spectrum

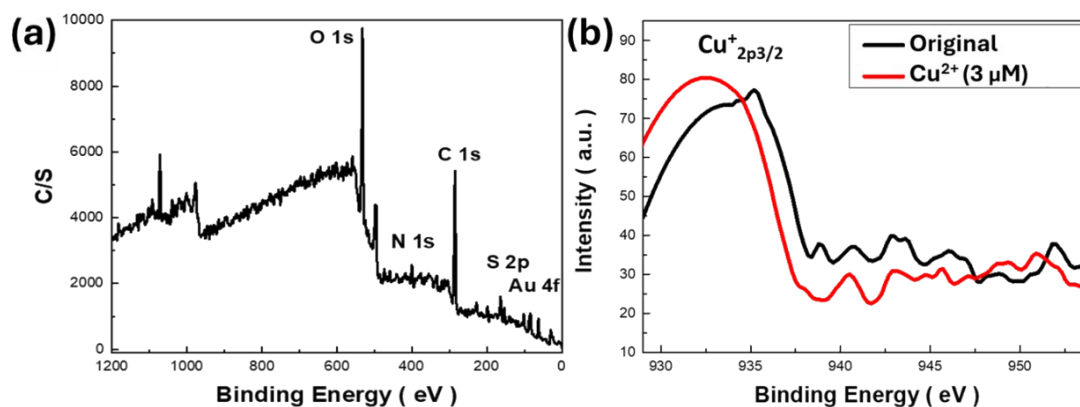

Fig. S2 (a) Full survey of XPS spectrum of CQD@AuNPs and (b) XPS identification of Cu<sup>2+</sup> oxidation when immersing probes in 3 μM of Cu<sup>2+</sup> -ions solutions for 5 min, where the appearance of Cu<sup>+</sup> 2p<sub>3/2</sub> signal revealing that the Cu<sup>2+</sup>/Cu<sup>1+</sup> reaction causes the reduction of thiol groups in CQD@AuNPs.

## S3 Optimal incorporations of CQDs with AuNPs for colorimetric detection

Table S1 Process conditions for synthesizing different Cu<sup>2+</sup>-ion based sensors and the corrected detection limits.

|            | CQD <sup>NS</sup> wt% | LOD    | R <sup>2</sup> |
|------------|-----------------------|--------|----------------|
| CQD        | 100                   | N/A    | 0.167          |
| AuNPs      | 0                     | N/A    | 0.559          |
| CQD@AuNP 1 | 2.1×10 <sup>-6</sup>  | 296 nM | 0.955          |
| CQD@AuNP 2 | 4.2×10 <sup>-6</sup>  | 18 nM  | 0.979          |
| CQD@AuNP 3 | 6.3×10 <sup>-6</sup>  | 235 nM | 0.924          |

## S4 Examinations of long-term stability and reliability for Cu<sup>2+</sup> detection

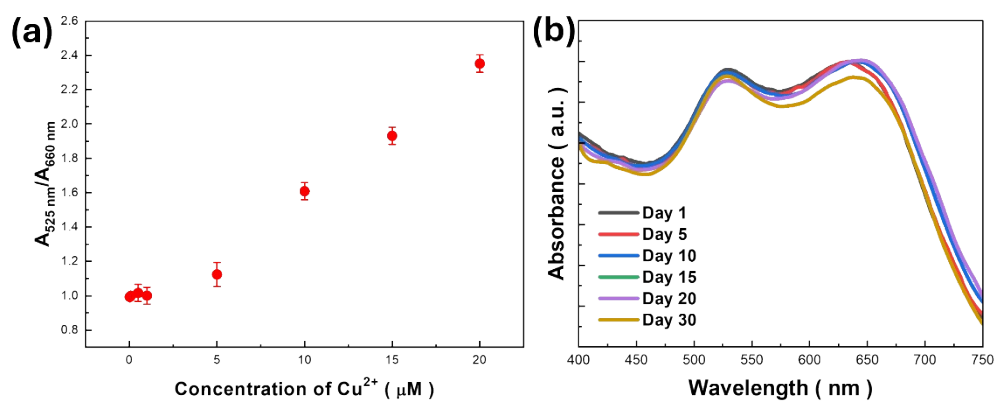

Fig. S3 (a) Measured ratios of  $A_{525\text{ nm}}/A_{660\text{ nm}}$  with respect to the presence of various  $\text{Cu}^{2+}$ -ion concentrations. (b) Examinations of long-term stability of probes for 30 days.
